# Supplementary material for: Preparation and characterization of a newly constructed multifunctional Co(ii)–organic framework: proton conduction and adsorption of Congo red in aqueous medium
Source: Royal Society of Chemistry journal article supplement (doi:10.1039/d2ce00330a), 2022-01-01
Supplement: d2ce00330a1.pdf [file d2ce00330a1.pdf]

**Table S1 The selected bond lengths (Å) and bond angles (°) of Co-MOF 1**

|             |            |              |           |
|-------------|------------|--------------|-----------|
| Co1—N1      | 1.921 (12) | Co2—O7       | 2.097 (5) |
| Co1—O5i     | 1.941 (6)  | Co2—O1       | 2.119 (5) |
| Co1—N3ii    | 1.962 (10) | Co2—N5       | 2.130 (5) |
| Co1—O2      | 1.967 (6)  | Co2—N7ii     | 2.138 (5) |
| Co2—O3i     | 2.046 (5)  | Co2—O1W      | 2.172 (4) |
| N1—Co1—O5i  | 101.5 (4)  | O5i—Co1—N3ii | 118.6 (3) |
| N1—Co1—N3ii | 98.3 (5)   |              |           |

Symmetry codes: (i)  $-x, y-1/2, -z+3$ ; (ii)  $x, y, z+1$ .

**Table S2 The selected hydrogen bonds of Co-MOF 1**

| $D-H\cdots A$          | $D-H$    | $H\cdots A$ | $D\cdots A$ | $D-H\cdots A$ |
|------------------------|----------|-------------|-------------|---------------|
| O1W—H11 $\cdots$ O2    | 0.84 (1) | 1.84 (2)    | 2.671 (5)   | 170 (5)       |
| O1W—H12 $\cdots$ O3W   | 0.84 (1) | 1.98 (3)    | 2.761 (5)   | 155 (5)       |
| O2W—H21 $\cdots$ O3    | 0.84 (1) | 1.94 (1)    | 2.768 (5)   | 172 (6)       |
| O2W—H22 $\cdots$ O4W   | 0.84 (1) | 1.80 (1)    | 2.637 (5)   | 172 (6)       |
| O3W—H31 $\cdots$ O1    | 0.83 (1) | 2.11 (1)    | 2.936 (5)   | 174 (6)       |
| O3W—H32 $\cdots$ O2    | 0.84 (1) | 1.91 (2)    | 2.735 (5)   | 168 (5)       |
| O4W—H41 $\cdots$ O3W   | 0.84 (1) | 2.06 (2)    | 2.859 (5)   | 158 (5)       |
| O4W—H42 $\cdots$ O3iii | 0.84 (1) | 1.91 (1)    | 2.741 (5)   | 175 (7)       |

Symmetry codes: (iii)  $x, y, z-1$ .

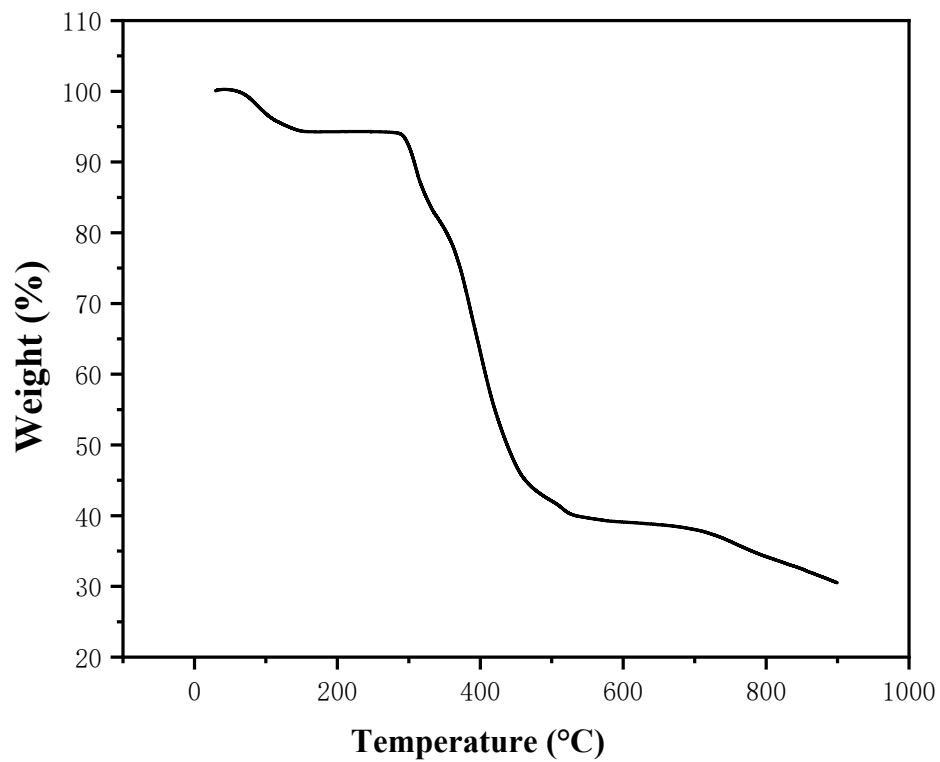

**Fig. S1** Thermogravimetric analysis of Co-MOF 1.

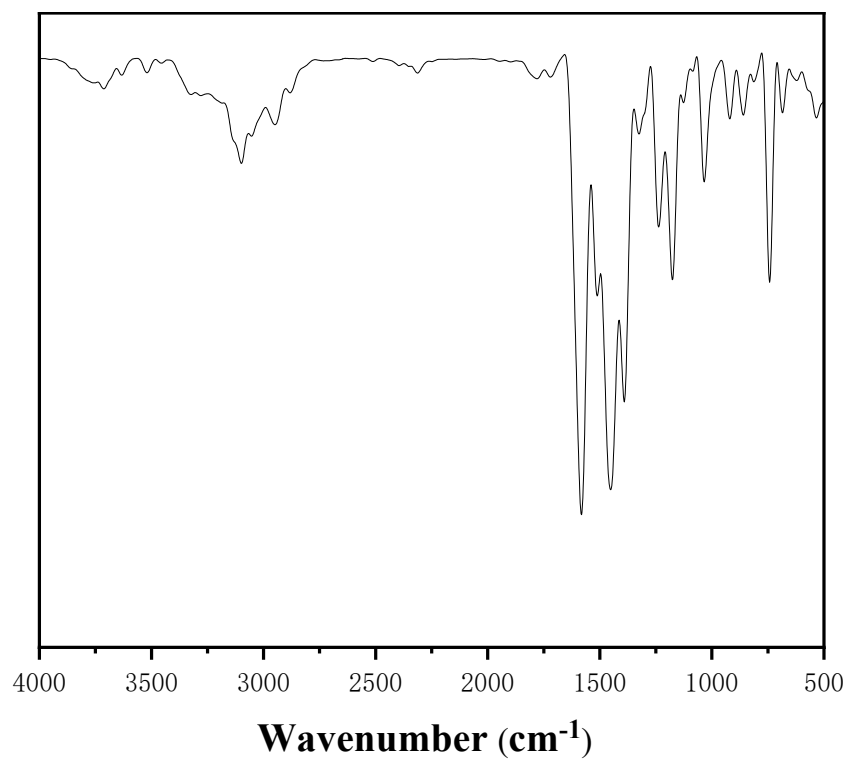

**Fig. S2** The FT-IR spectrum of Co-MOF 1

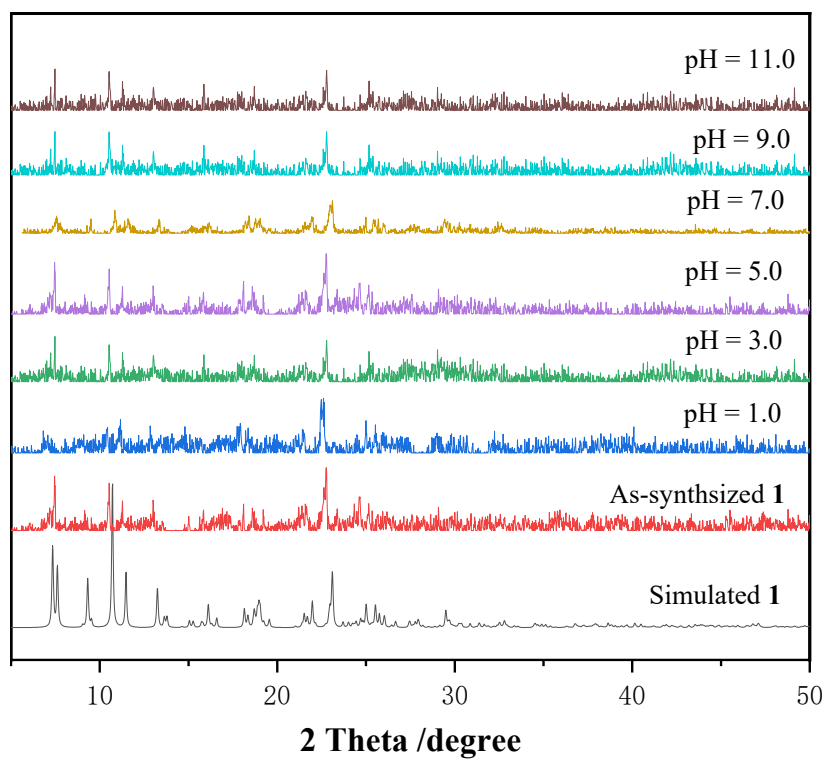

**Fig. S3.** PXRD patterns of the samples after being soaked in water with pH ranging from 1 to 11.

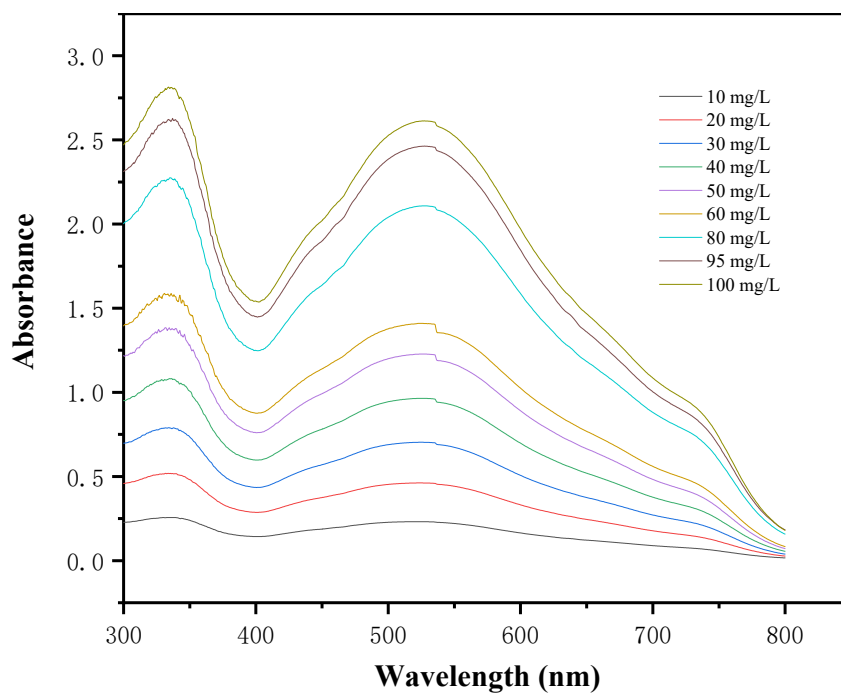

(a)

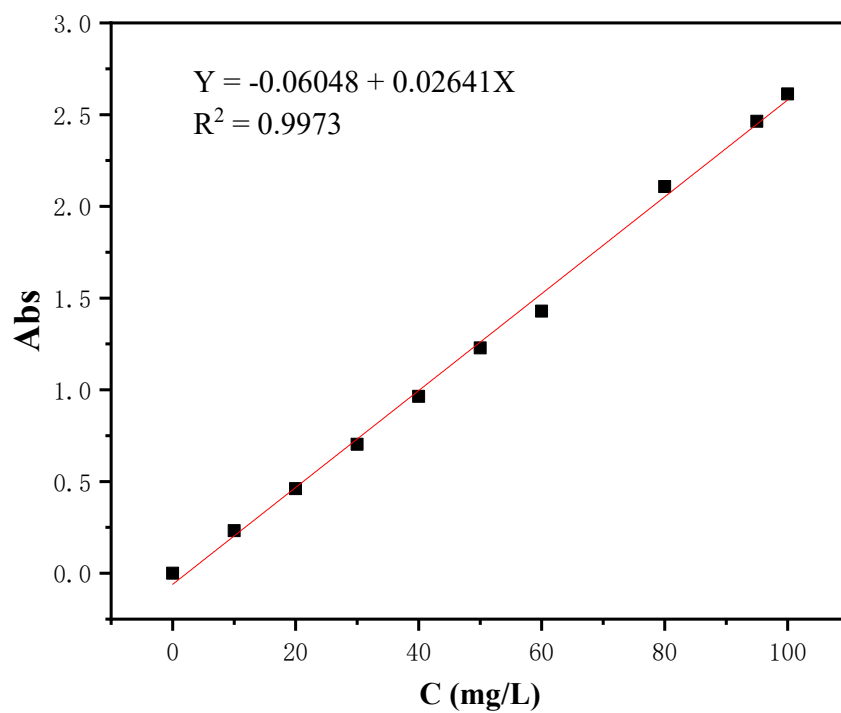

(b)

**Fig. S4** (a) UV-Vis spectra of a series of standard CR solutions (0 – 100 mg/L). (b) The calibration curve of the absorbance values (A) against the CR concentrations.

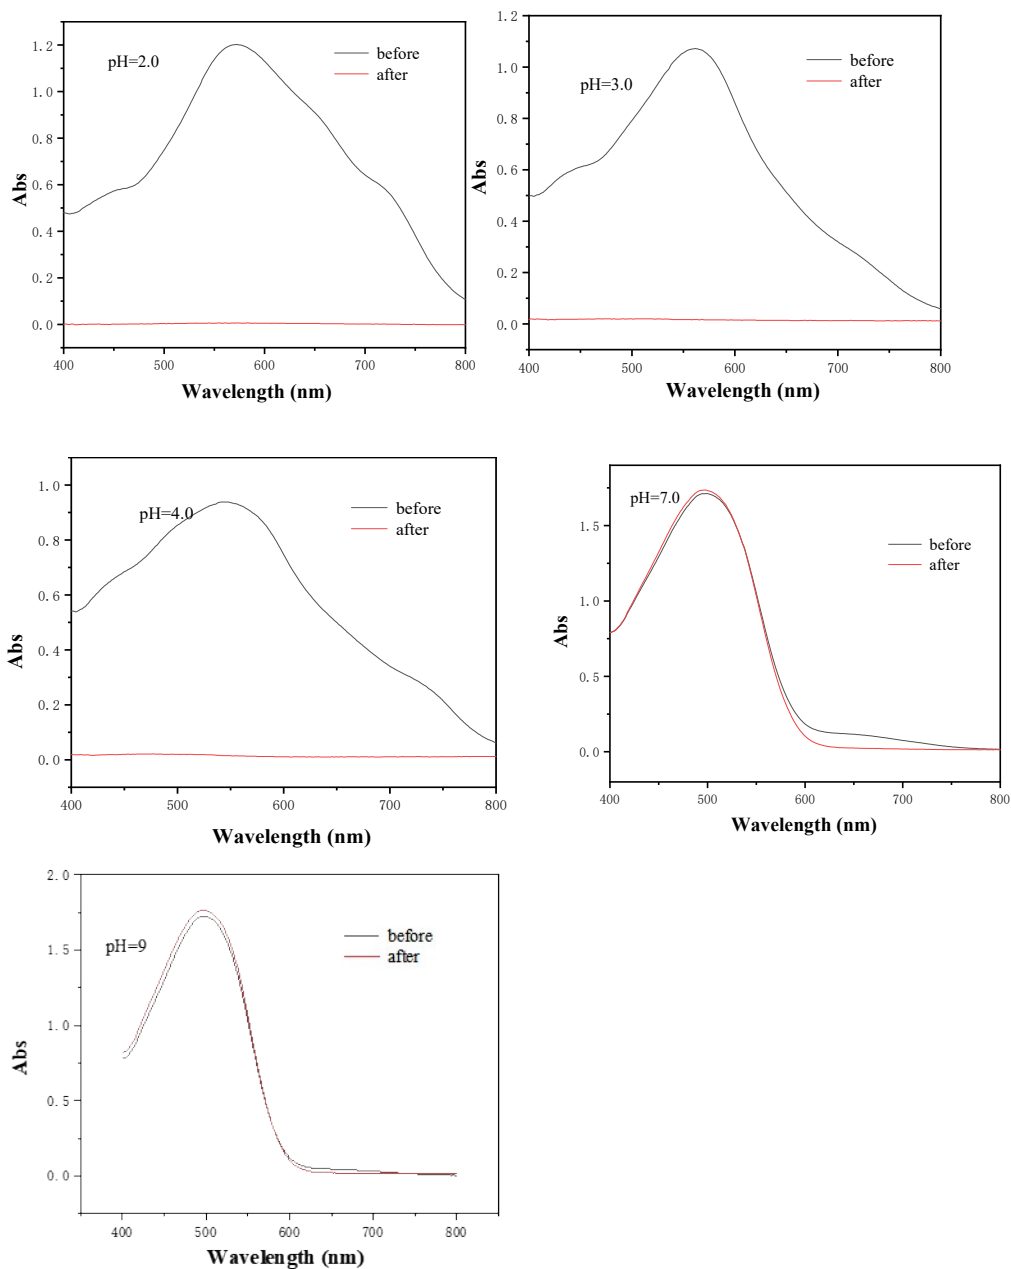

**Fig. S5** UV-Vis spectra of the CR solution (50 ml, 40 mg/L) before and after the addition of Co-MOF 1 at different pH.

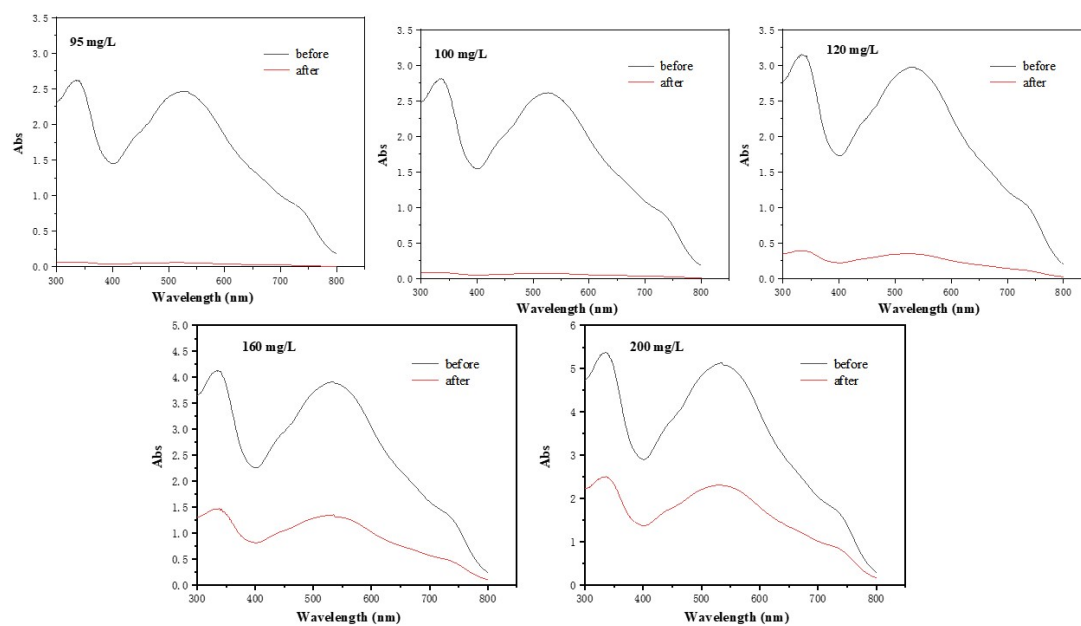

**Fig. S6** UV-Vis spectra of the different concentration solution of CR before and after the addition of Co-MOF 1.

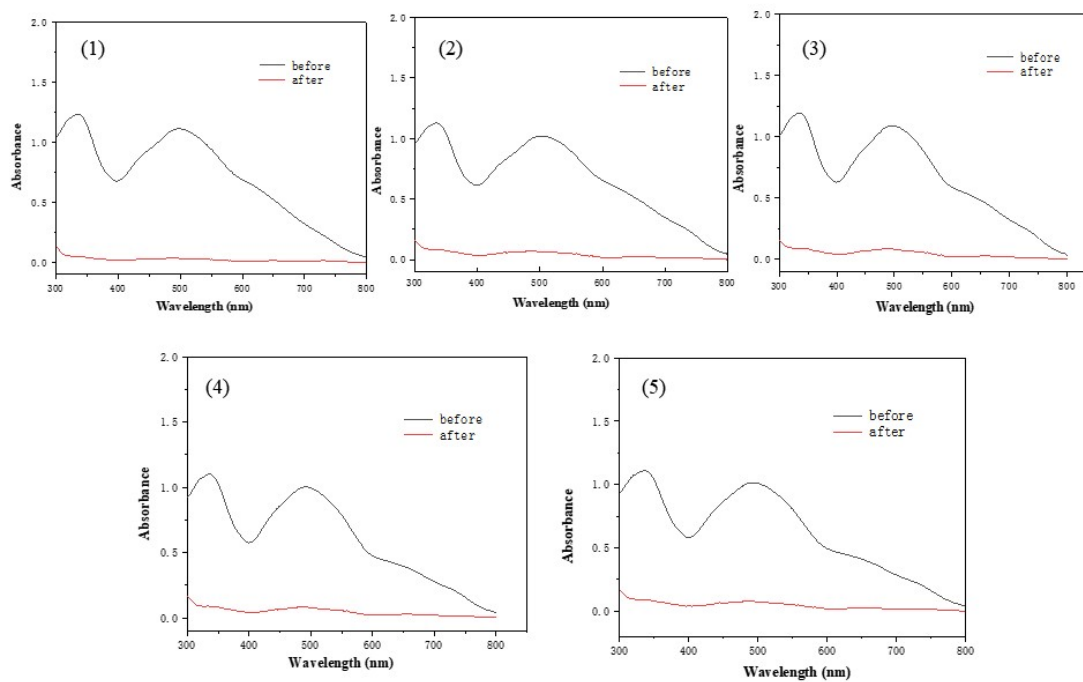

**Fig. S7** UV-Vis spectra of the CR solution before and after the addition of Co-MOF 1 after each of four cycles.
